# Supplementary material
Source: PubMed Central journal article supplement (PMC6925977)
Supplement: pnas.1912359116.sapp.pdf [file pnas.1912359116.sapp.pdf]

# PNAS

[www.pnas.org](http://www.pnas.org)

Supplementary Information for

**Mind the Gut: Alcohol Shifts Gut Microbial Networks and Ameliorates a Murine Model of Neuroinflammation in a Sex-Specific Pattern**

Blaine Caslin, Cole Maguire, Aditi Karmakar, Kailey Mohler, Dennis Wylie, Esther Melamed

Corresponding Author: Esther Melamed  
Email: [esther.melamed@austin.utexas.edu](mailto:esther.melamed@austin.utexas.edu)

**This PDF file includes:**

Figures S1 to S3  
Tables S1 to S3

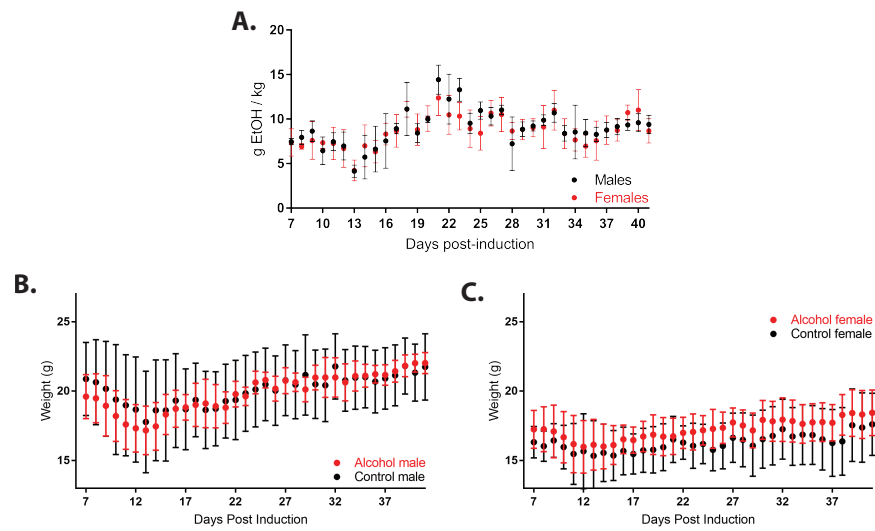

**Fig. S1. Alcohol consumption and body weight** A. Weight-adjusted alcohol consumption did not significantly differ between males and females throughout the experiment. Average body weight between the alcohol-consumers and controls were not significantly different within male (B.) or female (C.) groups ( $n=10$  per group).

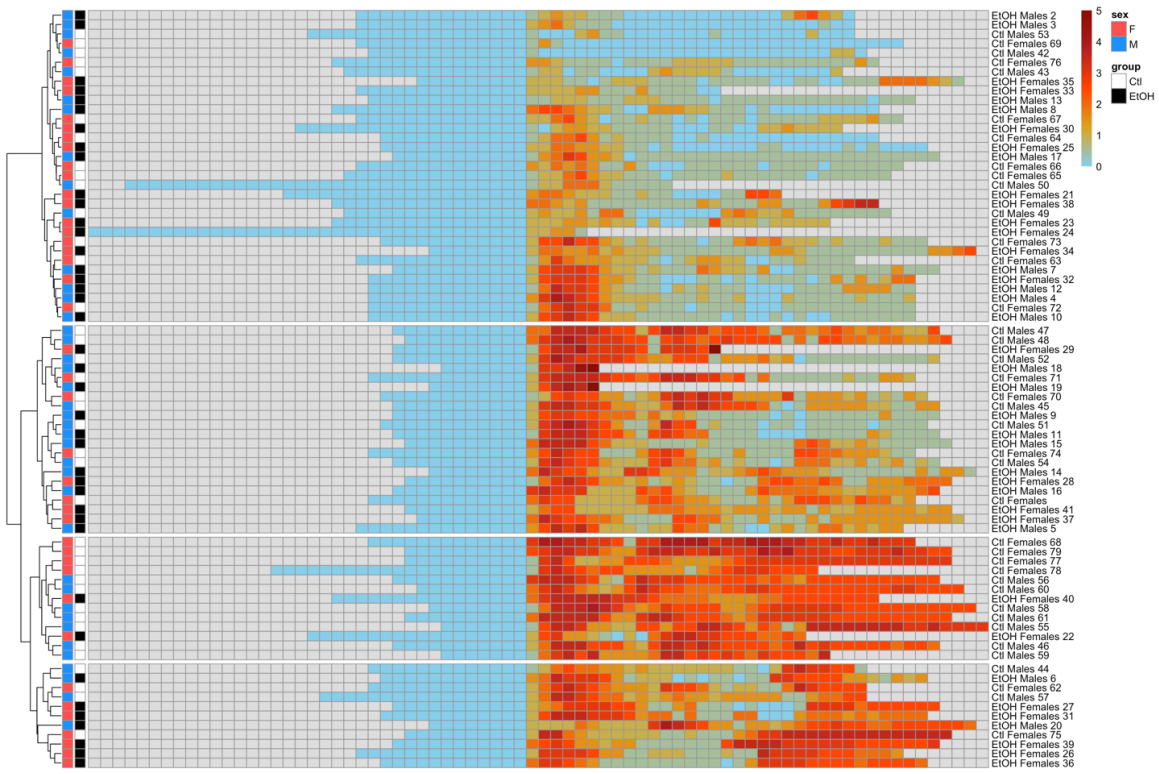

Fig. S2. Heat map of Clinical EAE scores aligned to first day of symptoms.

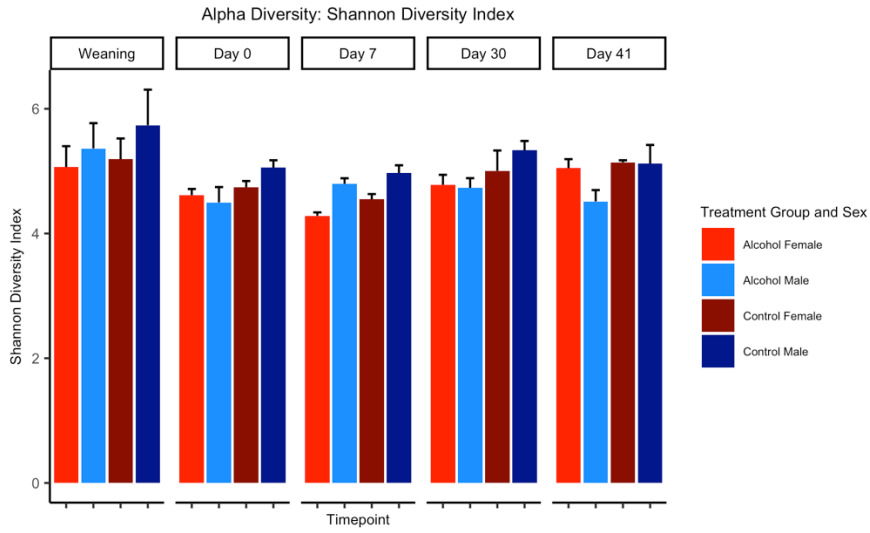

**Fig. S3.** Alpha Diversity Shannon Index for sex and treatment across experimental timepoints.

**Table S1.** Linear Mixed Effect Modeling statistical values with Benjamini Hochberg corrections for timepoints. (Green  $p < 0.1$ , yellow  $p < 0.2$ )

| Taxon                  | p-value      | FDR corrected |
|------------------------|--------------|---------------|
| Bifidobacterium        | 2.680192e-05 | 9.689924e-05  |
| Coriobacteriaceae_     | 5.407854e-02 | 7.905104e-02  |
| Adlercreutzia          | 2.952043e-05 | 9.910431e-05  |
| Bacteroides            | 1.714184e-13 | 8.056666e-12  |
| Parabacteroides        | 3.614653e-02 | 5.480280e-02  |
| Prevotella             | 3.376586e-01 | 3.870721e-01  |
| Alistipes              | 8.740353e-01 | 8.740353e-01  |
| Odoribacter            | 5.550392e-02 | 7.905104e-02  |
| .Prevotella.           | 3.185435e-02 | 4.990514e-02  |
| Enterococcus           | 7.268784e-01 | 7.426801e-01  |
| Lactobacillus          | 1.492003e-04 | 3.245658e-04  |
| Turicibacter           | 5.565890e-05 | 1.743979e-04  |
| Clostridiales_         | 8.222074e-02 | 1.136581e-01  |
| Clostridium            | 1.519244e-04 | 3.245658e-04  |
| SMB53                  | 2.965358e-04 | 6.059645e-04  |
| Dehalobacterium        | 3.815148e-03 | 6.641184e-03  |
| Lachnospiraceae_       | 2.175357e-01 | 2.690573e-01  |
| Coprococcus            | 5.839290e-01 | 6.098814e-01  |
| .Ruminococcus.         | 8.691999e-02 | 1.167211e-01  |
| Peptostreptococcaceae_ | 1.943661e-03 | 3.513541e-03  |
| Ruminococcaceae_       | 2.980132e-01 | 3.501656e-01  |
| Anaerotruncus          | 1.628847e-01 | 2.069076e-01  |
| Oscillospira           | 1.007715e-03 | 1.894504e-03  |
| Ruminococcus           | 1.045183e-01 | 1.364544e-01  |
| Allobaculum            | 9.876409e-05 | 2.730537e-04  |
| Coprobacillus          | 1.356446e-02 | 2.198378e-02  |
| Sutterella             | 5.351976e-04 | 1.048095e-03  |
| Helicobacter           | 7.773077e-03 | 1.304766e-02  |
| Enterobacteriaceae_    | 2.255812e-01 | 2.718542e-01  |
| Aggregatibacter        | 5.562341e-01 | 5.941591e-01  |
| Acinetobacter          | 4.037129e-01 | 4.412676e-01  |
| Akkermansia            | 9.124310e-05 | 2.680266e-04  |

**Table S2.** Linear Mixed Effect Modeling statistical values with Benjamini Hochberg corrections for treatment group. (Green p < 0.1, yellow p < 0.2)

| Taxon                     | p-value      | FDR corrected |
|---------------------------|--------------|---------------|
| Adlercreutzia             | 0.5267904201 | 0.580820207   |
| Bacteroides               | 0.6725767859 | 0.705385410   |
| Parabacteroides           | 0.7550083140 | 0.772984702   |
| Prevotella                | 0.3118806807 | 0.403037666   |
| Alistipes                 | 0.0231499191 | 0.099544652   |
| Odoribacter               | 0.6670345477 | 0.705385410   |
| .Prevotella.              | 0.0832501869 | 0.221785797   |
| Enterococcus              | 0.8830634747 | 0.883063475   |
| Lactobacillus             | 0.0220158054 | 0.099544652   |
| Turicibacter              | 0.0676314843 | 0.193876922   |
| Clostridiales.___         | 0.0156569091 | 0.084155887   |
| Clostridium               | 0.0038040300 | 0.027262215   |
| SMB53                     | 0.0466897435 | 0.143404212   |
| Dehalobacterium           | 0.0007129442 | 0.015328301   |
| Lachnospiraceae.___       | 0.0080725224 | 0.049588352   |
| Coprococcus               | 0.0001446390 | 0.006219478   |
| .Ruminococcus.            | 0.1316652813 | 0.221785797   |
| Peptostreptococcaceae.___ | 0.0931563002 | 0.221785797   |
| Ruminococcaceae.___       | 0.0441126043 | 0.143404212   |
| Anaerotruncus             | 0.3388848565 | 0.403037666   |
| Oscillospira              | 0.0358071586 | 0.128308985   |
| Ruminococcus              | 0.2420858441 | 0.325302853   |
| Allobaculum               | 0.3467998522 | 0.403037666   |
| Coprobacillus             | 0.2084144386 | 0.289090996   |
| Sutterella                | 0.4671688950 | 0.528638486   |
| Helicobacter              | 0.1619003377 | 0.240059121   |
| Enterobacteriaceae.___    | 0.2079510294 | 0.289090996   |
| Aggregatibacter           | 0.3388803556 | 0.403037666   |
| Akkermansia               | 0.0325561659 | 0.127265012   |

**Table S3.** Linear Mixed Effect Modeling statistical values with Benjamini Hochberg corrections for treatment group and sex. (Green  $p < 0.1$ , yellow  $p < 0.2$ )

| Taxon                     | p-value     | FDR corrected |
|---------------------------|-------------|---------------|
| Adlercreutzia             | 0.664774509 | 0.93140369    |
| Bacteroides               | 0.728182453 | 0.94884380    |
| Parabacteroides           | 0.671477081 | 0.93140369    |
| Prevotella                | 0.281187713 | 0.48364287    |
| Alistipes                 | 0.839006786 | 0.98055004    |
| Odoribacter               | 0.155146543 | 0.29005658    |
| .Prevotella.              | 0.048871089 | 0.12141657    |
| Enterococcus              | 0.866532596 | 0.98055004    |
| Lactobacillus             | 0.717041241 | 0.94884380    |
| Turicibacter              | 0.528889520 | 0.78421550    |
| Clostridiales.___         | 0.043111579 | 0.11586237    |
| Clostridium               | 0.998412799 | 0.99841280    |
| SMB53                     | 0.025449636 | 0.07816674    |
| Dehalobacterium           | 0.064739428 | 0.14346067    |
| Lachnospiraceae.___       | 0.113609424 | 0.23262882    |
| Coprococcus               | 0.012612298 | 0.07816674    |
| .Ruminococcus.            | 0.774228450 | 0.97917127    |
| Peptostreptococcaceae.___ | 0.203417205 | 0.36445583    |
| Ruminococcaceae.___       | 0.066725894 | 0.14346067    |
| Anaerotruncus             | 0.332704689 | 0.52986302    |
| Oscillospira              | 0.855500845 | 0.98055004    |
| Ruminococcus              | 0.154873169 | 0.29005658    |
| Allobaculum               | 0.818789876 | 0.98055004    |
| Coprobacillus             | 0.020335314 | 0.07816674    |
| Sutterella                | 0.004888834 | 0.07816674    |
| Helicobacter              | 0.050825542 | 0.12141657    |
| Enterobacteriaceae.___    | 0.033245448 | 0.09530362    |
| Aggregatibacter           | 0.345552650 | 0.53067014    |
| Akkermansia               | 0.896955290 | 0.98895070    |
